# Supplementary material
Source: publisher figshare collection journal article supplement (https://sage.figshare.com/ndownloader/files/23681549)
Supplement: Supplementary file 1 [file 23681549]

**Supplementary Table S1:** ERUS RARP curriculum modular training procedural steps and number of times performed by surgeon.

| **Steps** | **Performed** |
| --- | --- |
| Bladder detachment | 29 |
| Endopelvic fascia incision (if performed) | 16 |
| Bladder neck incision | 14 |
| Section of vasa and preparation of SVs | 23 |
| Dissection of the posterior plane | 23 |
| Dissection of the prostatic pedicles | 7 |
| Dissection of neurovascular bundles | 0 |
| Ligation of Santorini plexus (if performed) | 11 |
| Apical dissection | 3 |
| Urethro-vesical anastomosis | 2 |
